# Supplementary material
Source: MDPI journal article supplement (https://www.mdpi.com/2306-5338/7/4/84)

## Supplementary Materials

**Supplementary Materials:** the following are available online at <https://zenodo.org/record/4095208#.X6K9P7sxnCo>, Figure S. 1-9: Daily and monthly time series of simulated (weighted mean and max/min range from all hydrotops) runoff, soil wetness and ET compared with observations for the selected catchment (IDs from 1–3 and 5–10).

### Großscheidnitz (1)

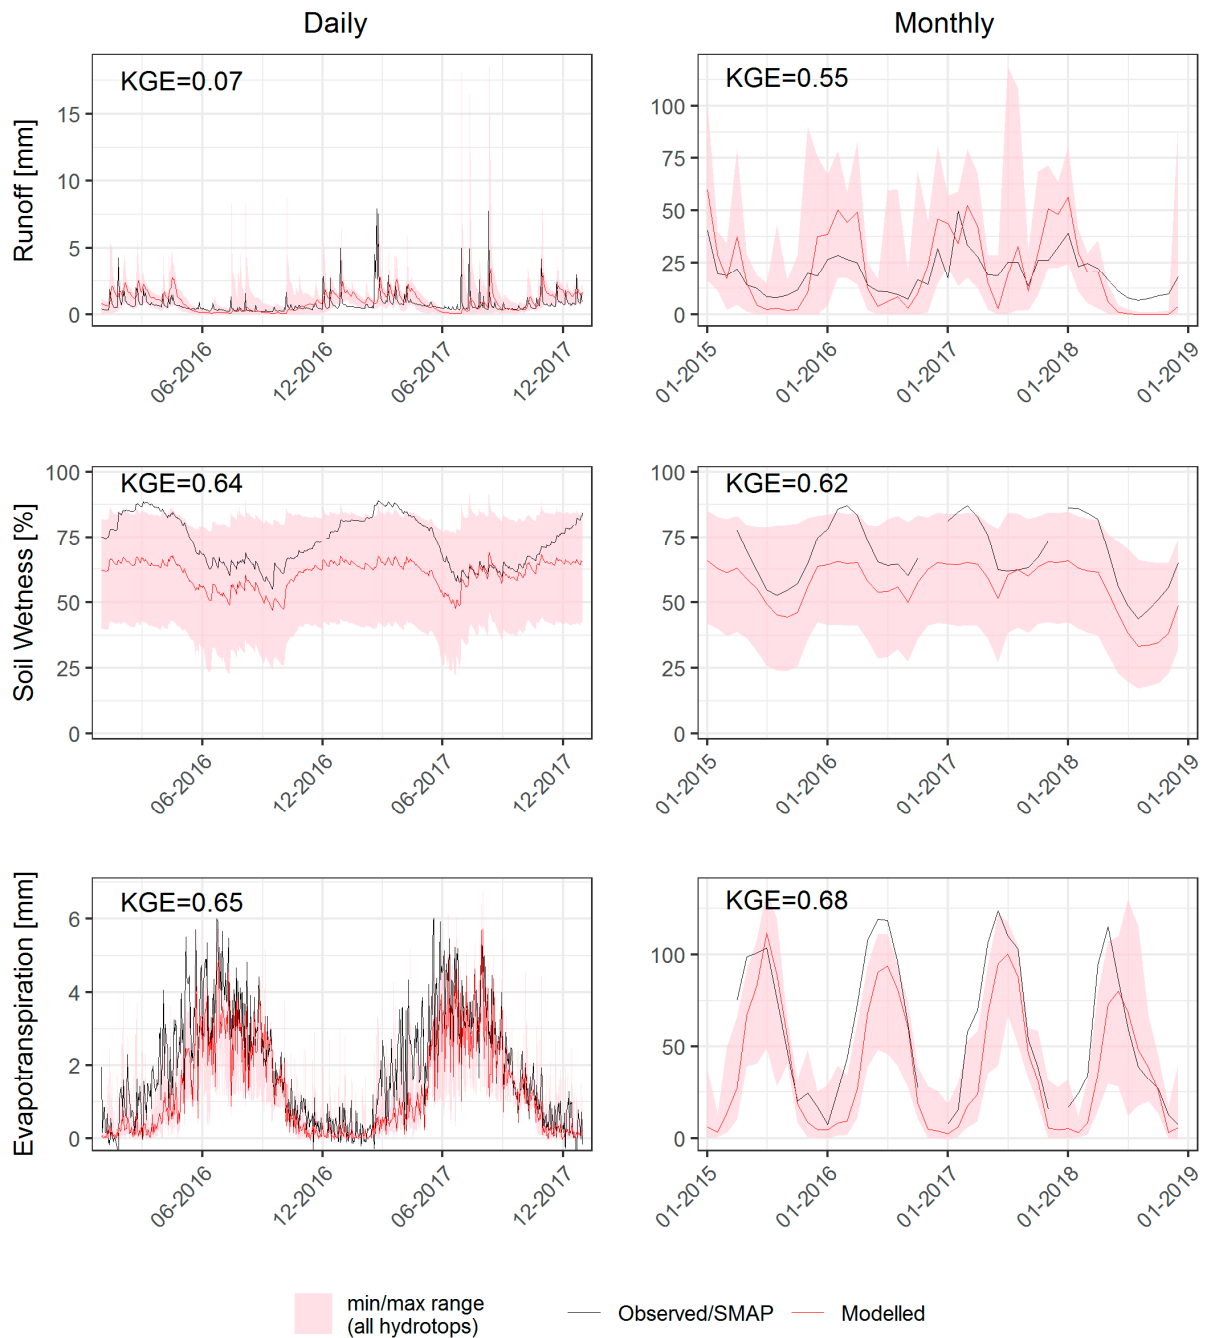

### Holtendorf (2)

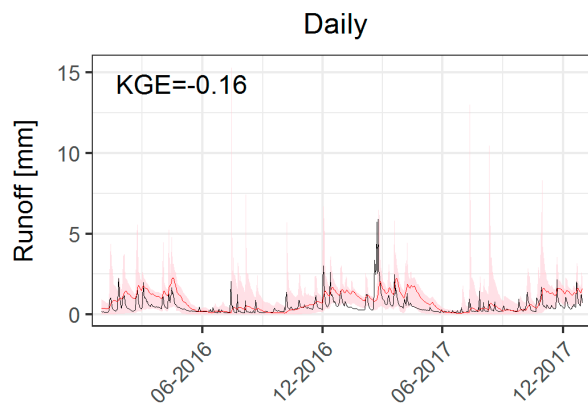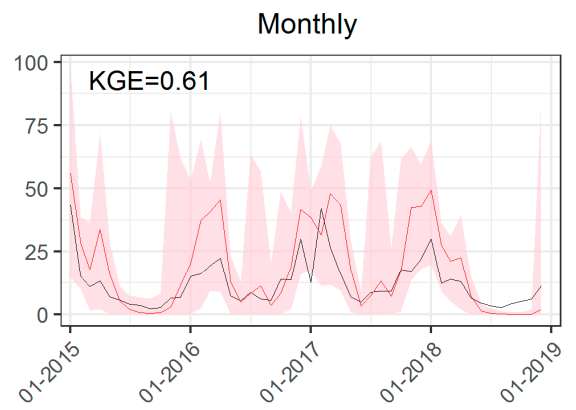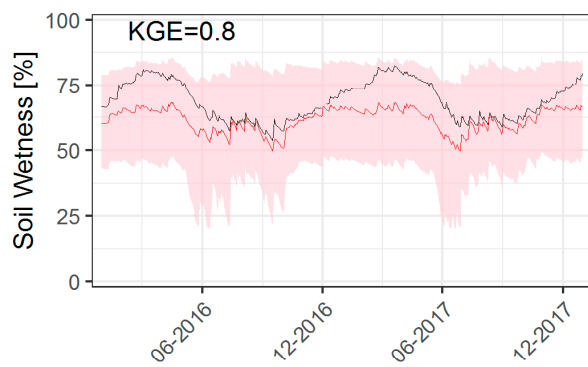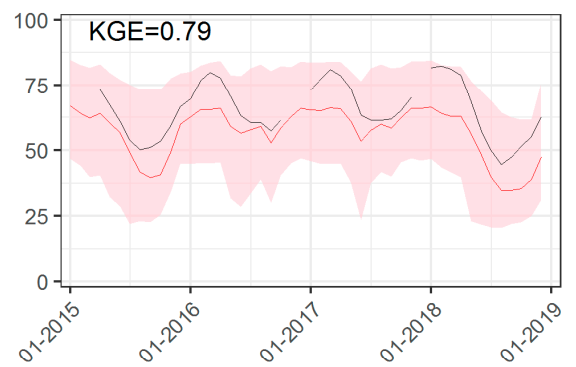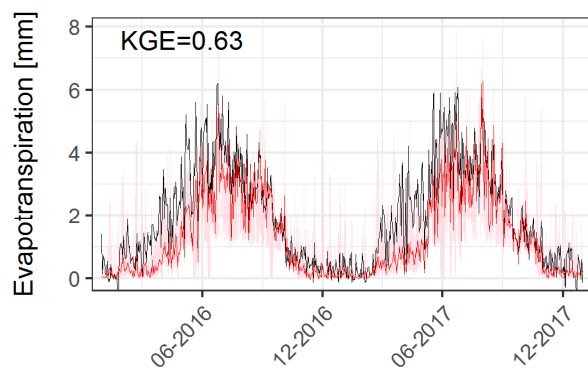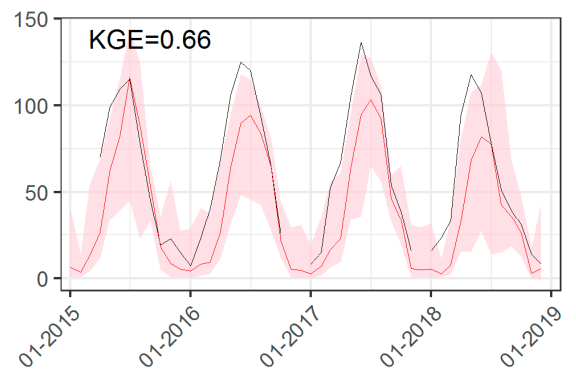

min/max range (all hydrotops)
  Observed/SMAP
  Modelled

### Kreischa (3)

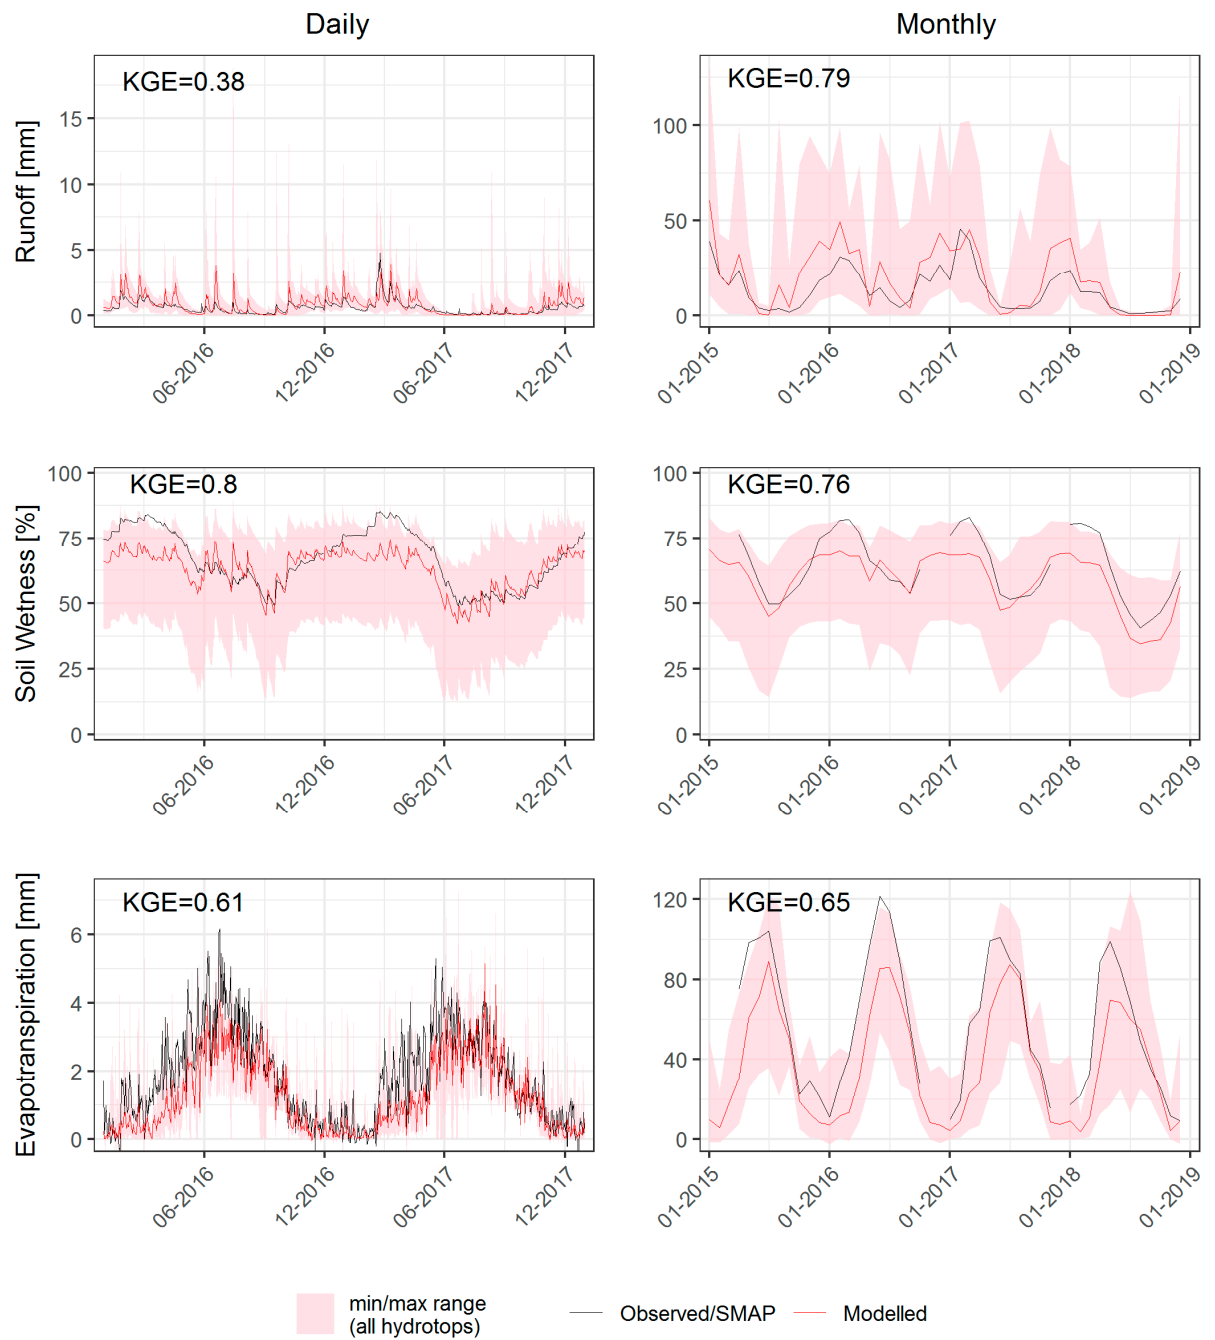

# Neustadt (5)

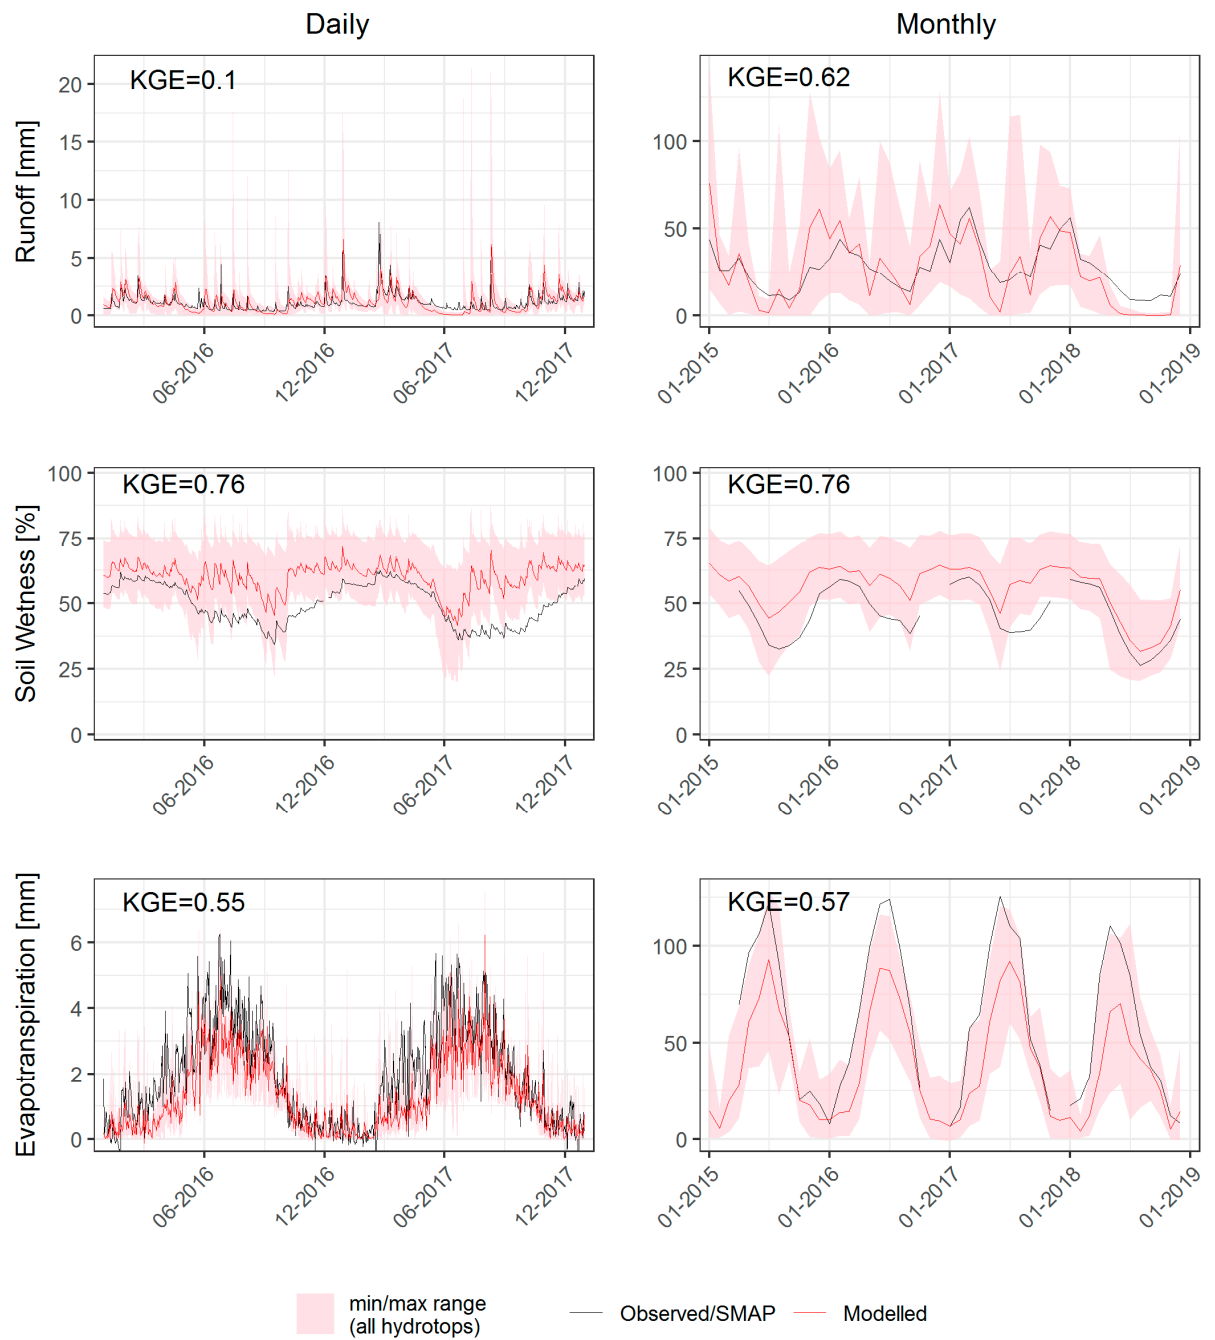

Niedermuelsen (6)

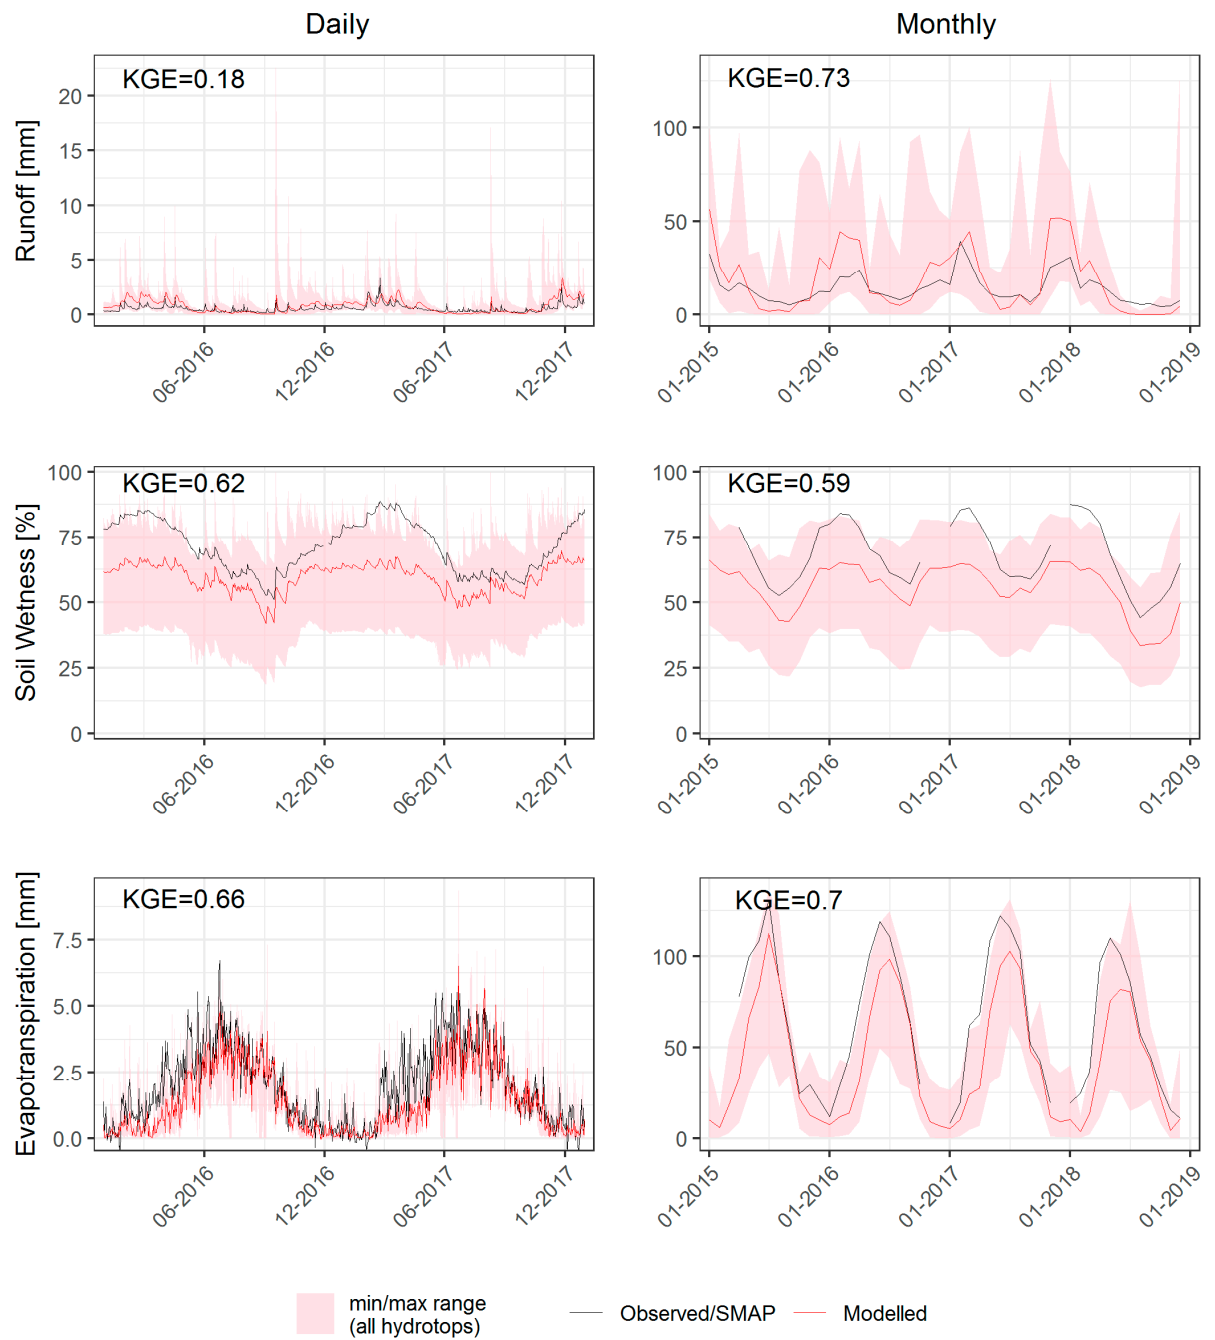

Nideroderwitz (7)

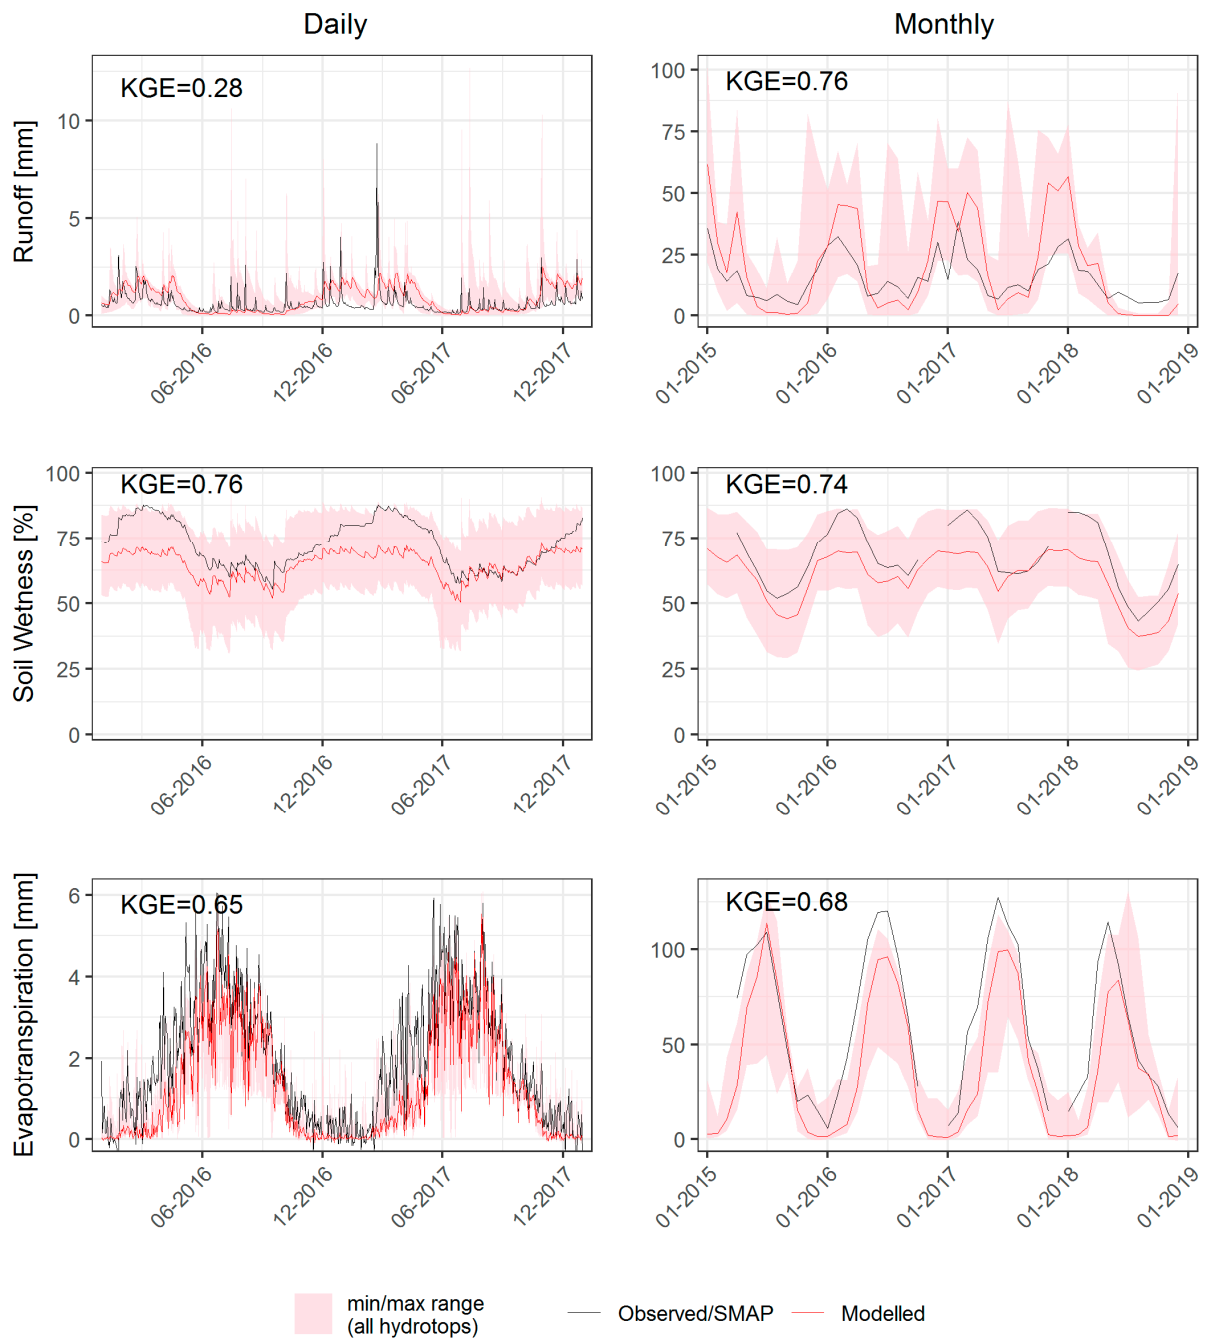

# Niederzwoenitz (8)

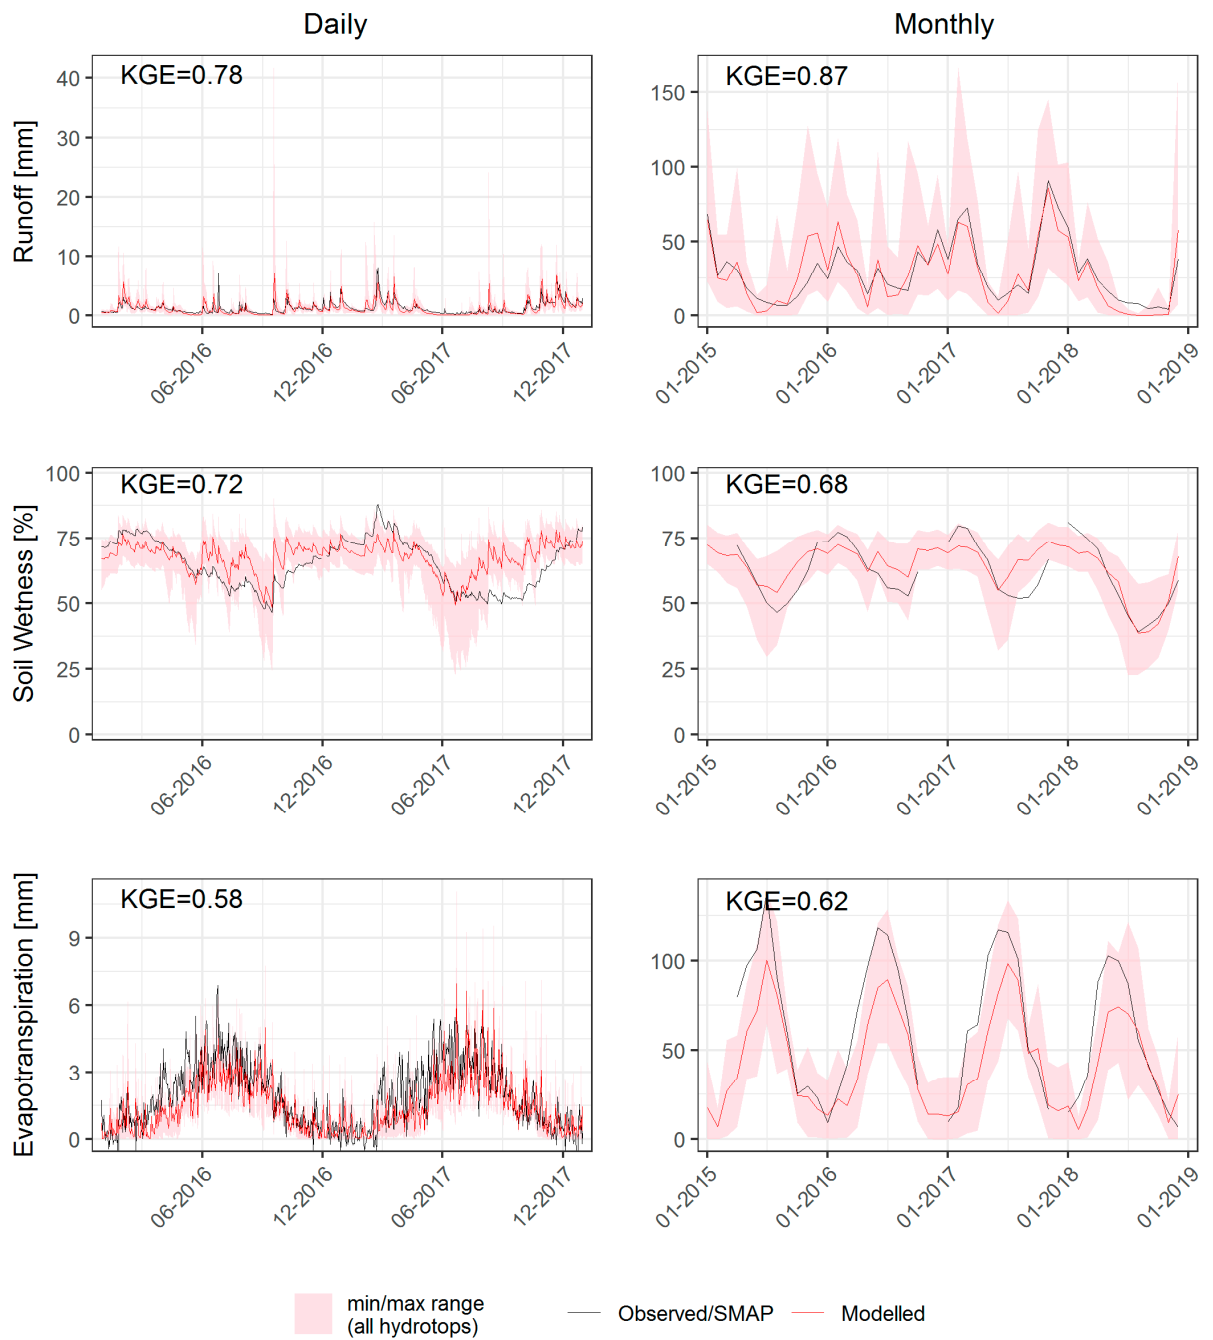

# Reichenbach-Oberlausitz (9)

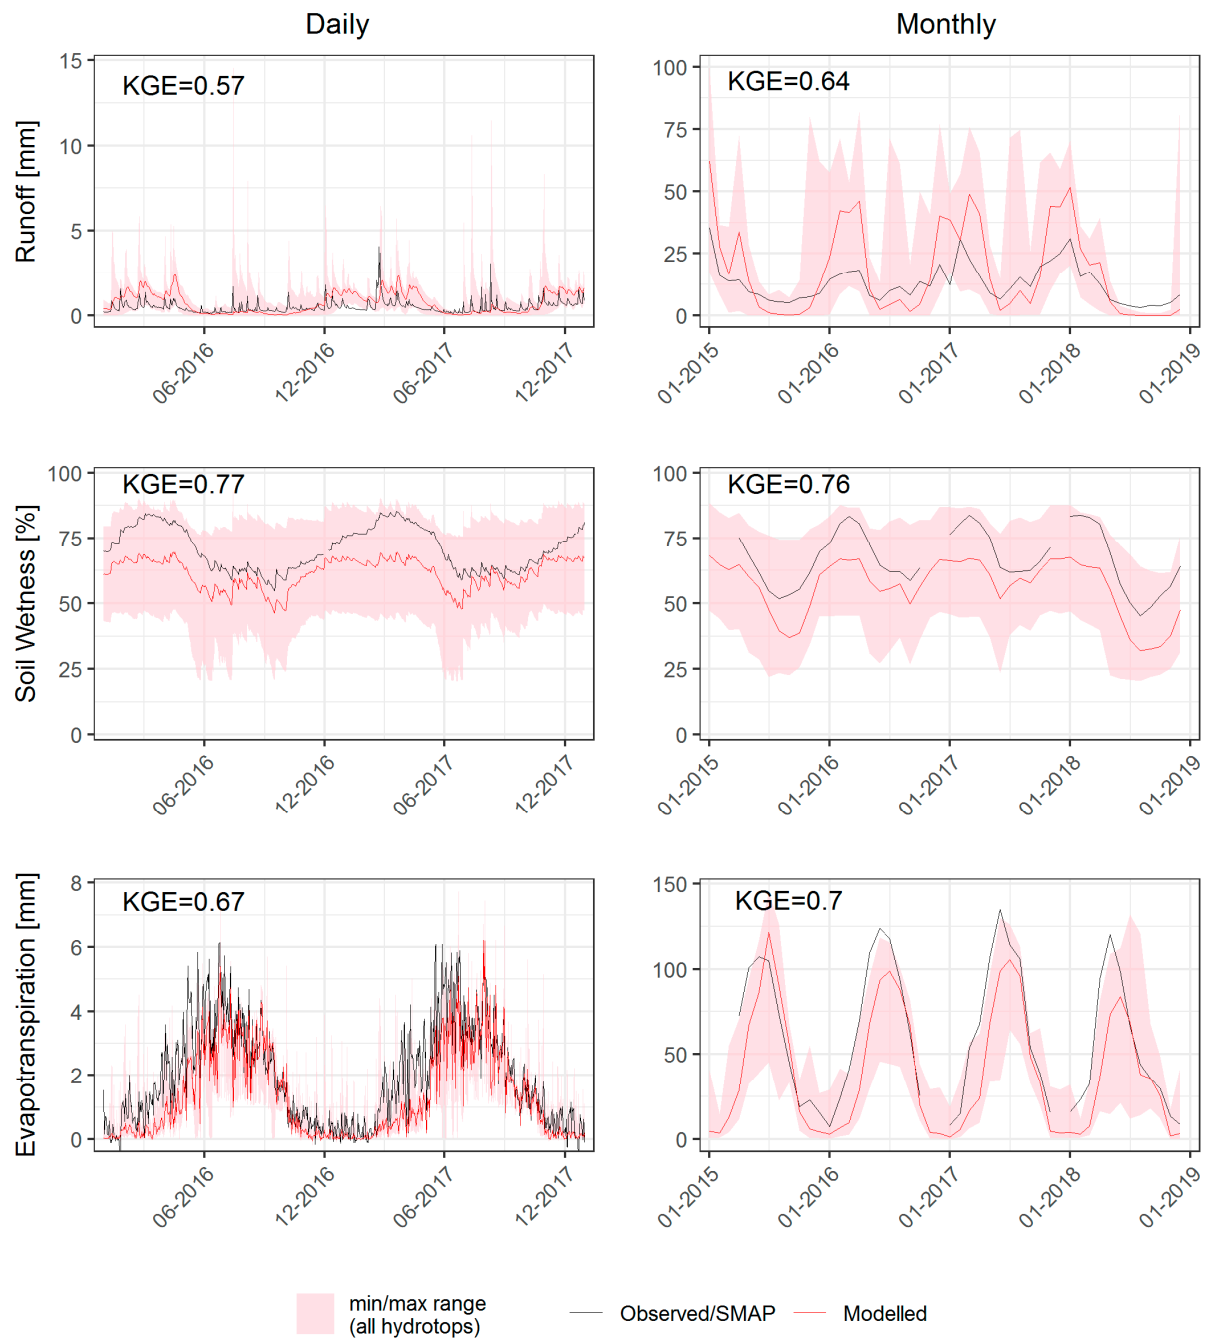

# Tannenberg (10)

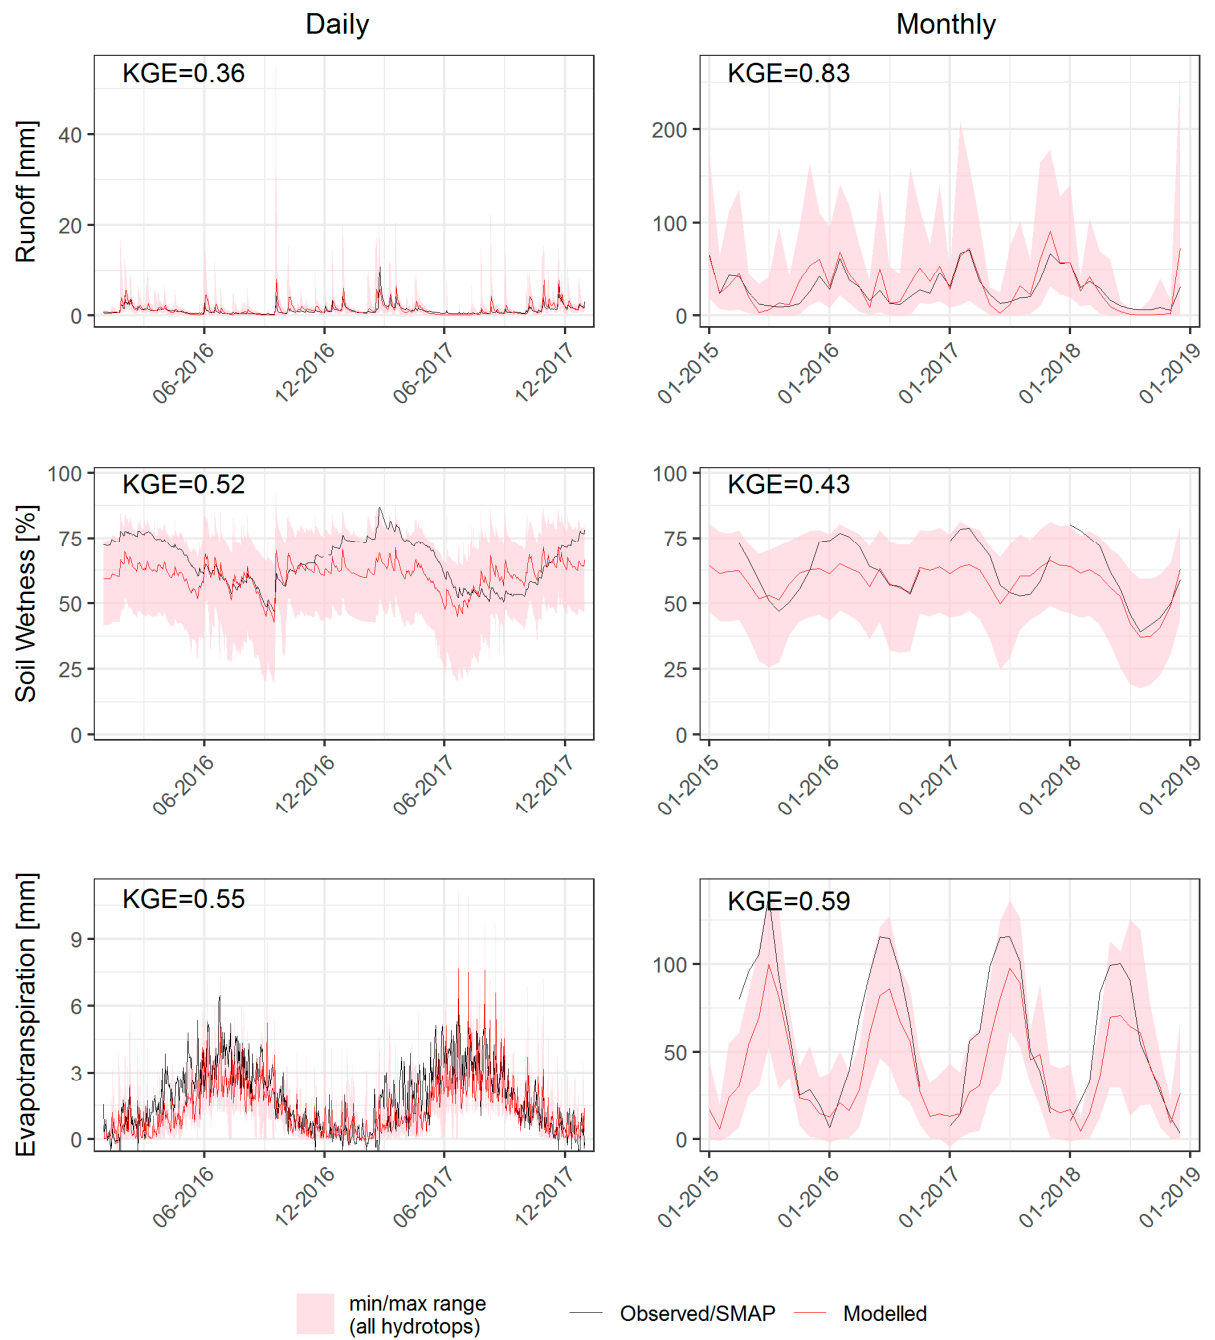

Supplement: s1 [file s1]
